# Supplementary material for: Introducing and Integrating Machine Learning in an Operations Research Curriculum: An Application-Driven Course
Source: Atypon-hosted journal article supplement (doi:10.1287/ited.2021.0256), 2023-01-01
Supplement: ited.2021.0256.sm1.zip [file Abstract_Rubric.pdf › UofT_TeachingMaterial/Project_Rubrics/Abstract_Rubric.pdf]

University of Toronto  
Department of Mechanical and Industrial Engineering  
**MIE368: Analytics in Action**  
(Fall 2020)

---

**Abstract Rubric (out of 5)**

|                                  | <b>Insufficient</b>                                                                                                                                         | <b>Satisfactory</b>                                                                                                                               | <b>Good</b>                                                                                                                                          | <b>Excellent</b>                                                                                                                                                 |
|----------------------------------|-------------------------------------------------------------------------------------------------------------------------------------------------------------|---------------------------------------------------------------------------------------------------------------------------------------------------|------------------------------------------------------------------------------------------------------------------------------------------------------|------------------------------------------------------------------------------------------------------------------------------------------------------------------|
| <b>Writing (3)</b>               | Poorly written with many errors.<br><br>Problem setup & conclusion are inappropriate or missing.<br><br>Formatting & length instructions were not followed. | Written with some errors.<br><br>Problem & conclusion are not well-motivated or connected.<br><br>Formatting & length instructions were followed. | Mostly well written with minor errors.<br><br>Problem is somewhat motivated.<br><br>Conclusions are correct but do not tie back to the main problem. | Very well written with no errors.<br><br>Problem is clearly written and well-motivated.<br><br>Conclusions are correct and tie results back to the main problem. |
| <b>Methods &amp; Results (2)</b> | Methods & results are inappropriate, missing, or poorly described.                                                                                          | Methods & results are appropriate, but missing key parts.                                                                                         | Methods are appropriate for the problem.<br><br>Results are included, but does not connect to the methods.                                           | Methods are clear and relevant.<br><br>Key results are included and connect to the methods described.                                                            |
