# Supplementary material for: Introducing and Integrating Machine Learning in an Operations Research Curriculum: An Application-Driven Course
Source: Atypon-hosted journal article supplement (doi:10.1287/ited.2021.0256), 2023-01-01
Supplement: ited.2021.0256.sm1.zip [file Final_Report_Rubric.pdf › UofT_TeachingMaterial/Project_Rubrics/Final_Report_Rubric.pdf]

University of Toronto  
Department of Mechanical and Industrial Engineering  
**MIE368: Analytics in Action**  
(Fall 2020)

---

**Final Report Rubric (out of 45)**

|                                                        | <b>Insufficient</b>                                                                                                                | <b>Satisfactory</b>                                                                                                                                                     | <b>Good</b>                                                                                                                                                                                 | <b>Excellent</b>                                                                                                                                                                    |
|--------------------------------------------------------|------------------------------------------------------------------------------------------------------------------------------------|-------------------------------------------------------------------------------------------------------------------------------------------------------------------------|---------------------------------------------------------------------------------------------------------------------------------------------------------------------------------------------|-------------------------------------------------------------------------------------------------------------------------------------------------------------------------------------|
| <b>Problem Setup (5)</b>                               | Problem is inappropriate & poorly described.                                                                                       | Problem is somewhat appropriate, but not described clearly or well-motivated.                                                                                           | Problem is appropriate, understandable, and well-motivated.                                                                                                                                 | Problem is interesting, described clearly, & convincingly well-motivated.                                                                                                           |
| <b>Data Collection &amp; Exploratory Analysis (10)</b> | Data is inappropriate for this problem or has not been appropriately cleaned.                                                      | Data has been somewhat transformed to be relevant for the problem.<br><br>Exploratory analysis is superficial & not useful.                                             | Data collection/transformation is appropriate.<br><br>Exploratory analysis gives useful insights to the problem.                                                                            | Data collection/transformation is perfect for the problem.<br><br>Exploratory analysis reveals insights that are later used to produce better methods.                              |
| <b>Methods &amp; Implementation (10)</b>               | Methods are both infeasible & inappropriate.<br><br>No validation, parameter tuning, or sensitivity analysis.                      | Methods are insufficient to answer the problem or incorrectly applied.<br><br>Limited validation, parameter tuning, or sensitivity analysis.                            | Methods are appropriate for the problem & mostly correct.<br><br>Models have had some validation, parameter tuning, and sensitivity analysis.                                               | Methods are thought-out, ideal for the problem, & correct.<br><br>Models are properly validated with parameter tuning & sensitivity analysis.                                       |
| <b>Insights (10)</b>                                   | No quantitative analysis and the model performs poorly.<br><br>No high-level insights are drawn from the analysis.                 | Some quantitative analysis is given, or the model does not perform very well and weaknesses are not identified.<br><br>High-level insights are not relevant.            | Quantitative analysis is given. Model performs somewhat well relative to the task. Some weaknesses are explained.<br><br>Analysis yields one interesting, high-level insight.               | Quantitative analysis is given. Model performs very well relative to the task. Any weaknesses are explained.<br><br>Analysis yields multiple interesting, high-level insights.      |
| <b>Summary (5)</b>                                     | The main question was not answered. No meaningful next steps are suggested.                                                        | Analysis & results suggest the main problem was partially answered. Some next steps are suggested.                                                                      | Analysis & results conclude the main problem was appropriately answered. Relevant next steps suggested.                                                                                     | Analysis & results conclude the main problem was answered successfully. Interesting next steps given.                                                                               |
| <b>Presentation &amp; Writing (5)</b>                  | Writing is mostly unclear with major errors. Diagrams are non-existent or unclear.<br><br>Does not follow formatting instructions. | Writing is at times unclear with multiple typos. Diagrams are not relevant or labelled.<br><br>Does not follow most formatting instructions. Clear abuse of appendices. | Writing is mostly clear. Minor typos. Diagrams are relevant but sometimes unclear.<br><br>Follows most formatting instructions. Appendices (if included) are somewhat necessary & relevant. | Writing is consistently clear & correct. Diagrams are relevant, labelled, and clear.<br><br>Follows all formatting instructions. Appendices (if included) are necessary & relevant. |
