# Supplementary material for: Introducing and Integrating Machine Learning in an Operations Research Curriculum: An Application-Driven Course
Source: Atypon-hosted journal article supplement (doi:10.1287/ited.2021.0256), 2023-01-01
Supplement: ited.2021.0256.sm1.zip [file Preliminary_Report_Rubric.pdf › UofT_TeachingMaterial/Project_Rubrics/Preliminary_Report_Rubric.pdf]

University of Toronto  
Department of Mechanical and Industrial Engineering  
**MIE368: Analytics in Action**  
(Fall 2020)

---

**Preliminary Report Rubric (out of 15)**

|                                      | <b>Insufficient</b>                                                                                                                 | <b>Satisfactory</b>                                                                                                                                    | <b>Good</b>                                                                                                                               | <b>Excellent</b>                                                                                                                                              |
|--------------------------------------|-------------------------------------------------------------------------------------------------------------------------------------|--------------------------------------------------------------------------------------------------------------------------------------------------------|-------------------------------------------------------------------------------------------------------------------------------------------|---------------------------------------------------------------------------------------------------------------------------------------------------------------|
| <b>Exploratory Data Analysis (5)</b> | Inappropriate/ insufficient dataset. Data is not appropriately cleaned.<br><br>EDA Analysis is irrelevant to the main problem       | Appropriate but insufficient dataset. Data has been somewhat transformed for the problem<br><br>Contains superficial EDA insights                      | Appropriate dataset. Data has been appropriately transformed for the problem.<br><br>Contains some EDA insights to guide the model        | Unique dataset. Data has been perfectly transformed for the problem.<br><br>Contains many interesting EDA insights to guide the model                         |
| <b>Initial Model (3)</b>             | Methods are both infeasible & inappropriate.<br><br>Modelling is irrelevant to the main problem                                     | Methods are insufficient to answering the problem or incorrectly applied.<br><br>Contains superficial insights                                         | Methods are appropriate for the problem & mostly correct.<br><br>Contains some insights                                                   | Methods are thought-out, ideal for the problem, & correct.<br><br>Contains many interesting insights                                                          |
| <b>Next Steps (3)</b>                | Unclear plan going forwards. Not connected to the EDA OR initial results<br><br>No suggestions for model improvements or extensions | Somewhat clear plan going forwards, somewhat guided by the EDA or initial results<br><br>Unreasonable suggestions for model improvements or extensions | Mostly clear plan going forwards guided by the EDA or initial results.<br><br>Reasonable suggestions for model improvements or extensions | Completely clear and well motivated plan going forward guided by the EDA and initial results<br><br>Creative suggestions for model improvements or extensions |
| <b>Writing Quality (4)</b>           | Incoherent with numerous grammatical errors and a complete lack of structure/flow<br><br>Diagrams are nonexistent or unclear.       | Partially clear with regular grammatical errors. Poorly structured with little flow<br><br>Diagrams are not relevant or labelled.                      | Mostly clear with some grammatical errors. Decently structured and decent flow.<br><br>Diagrams are relevant but sometimes unclear.       | Very clear with no grammatical errors. Well structured and strong flow.<br><br>Diagrams are relevant, labelled and clear.                                     |
