# Supplementary material for: Introducing and Integrating Machine Learning in an Operations Research Curriculum: An Application-Driven Course
Source: Atypon-hosted journal article supplement (doi:10.1287/ited.2021.0256), 2023-01-01
Supplement: ited.2021.0256.sm1.zip [file Presentation_Rubric.pdf › UofT_TeachingMaterial/Project_Rubrics/Presentation_Rubric.pdf]

University of Toronto  
Department of Mechanical and Industrial Engineering  
**MIE368: Analytics in Action**  
(Fall 2020)

---

**Presentation Rubric (out of 25)**

|                                         | <b>Insufficient</b>                                                                                                                               | <b>Satisfactory</b>                                                                                                                                                     | <b>Good</b>                                                                                                                                | <b>Excellent</b>                                                                                                                                                     |
|-----------------------------------------|---------------------------------------------------------------------------------------------------------------------------------------------------|-------------------------------------------------------------------------------------------------------------------------------------------------------------------------|--------------------------------------------------------------------------------------------------------------------------------------------|----------------------------------------------------------------------------------------------------------------------------------------------------------------------|
| <b>Presentation of the problem (5)</b>  | Problem is inappropriate and poorly described.                                                                                                    | Problem is somewhat appropriate, but not well described or motivated.                                                                                                   | Problem is appropriate and well described and motivated.                                                                                   | Problem is well introduced, and convincingly motivated and concluded.                                                                                                |
| <b>Methods &amp; implementation (6)</b> | Methods are presented with excessive or limited detail.<br><br>No graphics are used to enhance explanations.                                      | Portions of the methods are presented with sufficient detail.<br><br>Few graphics are used to enhance explanations.                                                     | Methods are presented with appropriate detail and justification.<br><br>Some graphics are used to enhance explanations.                    | Methods are clearly presented with detail and convincing justification.<br><br>Graphics are used to greatly enhance explanations.                                    |
| <b>Evaluation (6)</b>                   | Evaluation metrics are unclear or are not mentioned.<br><br>Results are not presented.                                                            | Evaluation metrics are somewhat clear and may be inappropriate for the problem.<br><br>Results are unclear or difficult to interpret. Some weak benchmarks are present. | Evaluation metrics are mostly clear and appropriate for the problem.<br><br>Results are reported with benchmarks and appropriate analysis. | Evaluation metrics are clear and appropriate.<br><br>Results are clearly reported with benchmarks. Thorough analysis highlights strengths and weaknesses of methods. |
| <b>Delivery (5)</b>                     | No members speak clearly or are easy to understand.<br><br>All questions are answered inappropriately.                                            | Some members speak clearly, are well-paced, and are easy to understand.<br><br>Some questions are answered appropriately.                                               | Most members speak clearly, are well-paced, and are easy to understand.<br><br>Most questions are well-received and answered.              | All members speak clearly, well-paced, and are easy to understand.<br><br>All answers demonstrate clear understanding of the work.                                   |
| <b>Organization (3)</b>                 | Very few slides are aesthetically pleasing.<br><br>Presentation is not 5 minutes 20 seconds long, or slides do not auto advance every 20 seconds. | Some slides are aesthetically pleasing.<br><br>Presentation is 5 minutes and 20 seconds long, and slides auto advance every 20 seconds. (i.e., follows PK format)       | Most slides are aesthetically pleasing.<br><br>Information on most slides is appropriate for 20 second auto advancing slides.              | All slides are aesthetically pleasing.<br><br>Information on all slides are concise and clear to follow in PK setting.                                               |
