# Supplementary material for: Introducing and Integrating Machine Learning in an Operations Research Curriculum: An Application-Driven Course
Source: Atypon-hosted journal article supplement (doi:10.1287/ited.2021.0256), 2023-01-01
Supplement: ited.2021.0256.sm1.zip [file Proposal_Rubric.pdf › UofT_TeachingMaterial/Project_Rubrics/Proposal_Rubric.pdf]

University of Toronto  
Department of Mechanical and Industrial Engineering  
**MIE368: Analytics in Action**  
(Fall 2020)

---

**Proposal Rubric (out of 10)**

|                                         | <b>Insufficient</b>                                                                                         | <b>Satisfactory</b>                                                                                                                                             | <b>Good</b>                                                                                                                                              | <b>Excellent</b>                                                                                                                                                                                                                                  |
|-----------------------------------------|-------------------------------------------------------------------------------------------------------------|-----------------------------------------------------------------------------------------------------------------------------------------------------------------|----------------------------------------------------------------------------------------------------------------------------------------------------------|---------------------------------------------------------------------------------------------------------------------------------------------------------------------------------------------------------------------------------------------------|
| <b>Project Data and Methodology (4)</b> | Data source(s) are not proposed.<br><br>No clear plan for project completion.                               | Data source is typical.<br><br>Methodology is a simple application of an approach discussed in class.                                                           | Data drawn from multiple sources or single source and somewhat challenging to use.<br><br>Methodology is an extension of an approach discussed in class. | Data drawn from multiple sources or single source and will be challenging to use.<br><br>Methodology combines multiple components (e.g., prediction and optimization) or rigorously compares different approaches and go well beyond lab content. |
| <b>Creativity/Originality (3)</b>       | Idea is inappropriate.<br><br>Data and methodology are not relevant for the problem. No suggested outcomes. | Idea is borrowed or standard and not well-motivated.<br><br>Data and methodology somewhat capture the problem and proposed outcomes are expected or unoriginal. | Idea is appropriate and somewhat well-motivated.<br><br>Data and methodology mostly capture the problem, and the proposed outcomes are relevant.         | Idea is interesting and well-motivated.<br><br>Data and methodology fully capture the problem, and the proposed outcomes are relevant and novel.                                                                                                  |
| <b>Writing Quality (3)</b>              | Incoherent with numerous grammatical errors and a lack of structure.                                        | Partially clear with regular grammatical errors. Poorly structured.                                                                                             | Mostly clear with some grammatical errors. Well structured.                                                                                              | Very clear with almost no grammatical errors. Very well structured.                                                                                                                                                                               |
