# Supplementary material for: Introducing and Integrating Machine Learning in an Operations Research Curriculum: An Application-Driven Course
Source: Atypon-hosted journal article supplement (doi:10.1287/ited.2021.0256), 2023-01-01
Supplement: ited.2021.0256.sm1.zip [file Syllabus.pdf › UofT_TeachingMaterial/Syllabus.pdf]

University of Toronto  
Department of Mechanical and Industrial Engineering  
**MIE368: Analytics in Action**  
(Fall 2020)

---

|                     |                                                                                                                                                                                                                                                                                                                                                                                                                                                                                                                                                                                                                                                                                                                                                                                                                                                                                                                                                                                                                                                                                                                                                            |                             |
|---------------------|------------------------------------------------------------------------------------------------------------------------------------------------------------------------------------------------------------------------------------------------------------------------------------------------------------------------------------------------------------------------------------------------------------------------------------------------------------------------------------------------------------------------------------------------------------------------------------------------------------------------------------------------------------------------------------------------------------------------------------------------------------------------------------------------------------------------------------------------------------------------------------------------------------------------------------------------------------------------------------------------------------------------------------------------------------------------------------------------------------------------------------------------------------|-----------------------------|
| <b>Instructor</b>   | Timothy Chan, MC315, tcychan@mie.utoronto.ca<br>Office hours: By appointment                                                                                                                                                                                                                                                                                                                                                                                                                                                                                                                                                                                                                                                                                                                                                                                                                                                                                                                                                                                                                                                                               |                             |
| <b>TAs</b>          | Anonymized TA #1<br>Anonymized TA #2<br>Anonymized TA #3                                                                                                                                                                                                                                                                                                                                                                                                                                                                                                                                                                                                                                                                                                                                                                                                                                                                                                                                                                                                                                                                                                   |                             |
| <b>Lectures</b>     | Mon 10am-12pm                                                                                                                                                                                                                                                                                                                                                                                                                                                                                                                                                                                                                                                                                                                                                                                                                                                                                                                                                                                                                                                                                                                                              | Online (via BB Collaborate) |
| <b>Lab</b>          | Wed 3-6pm                                                                                                                                                                                                                                                                                                                                                                                                                                                                                                                                                                                                                                                                                                                                                                                                                                                                                                                                                                                                                                                                                                                                                  | Online (via BB Collaborate) |
| <b>Tutorial</b>     | Thurs 9-10am                                                                                                                                                                                                                                                                                                                                                                                                                                                                                                                                                                                                                                                                                                                                                                                                                                                                                                                                                                                                                                                                                                                                               | Online (via BB Collaborate) |
| <b>Course Site</b>  | on q.utoronto.ca                                                                                                                                                                                                                                                                                                                                                                                                                                                                                                                                                                                                                                                                                                                                                                                                                                                                                                                                                                                                                                                                                                                                           |                             |
| <b>Description</b>  | This course showcases the impact of analytics focusing on real world examples and case studies. Particular focus on decision analytics, where data and models are combined to ultimately improve decision-making. Methods include: linear and logistic regression, classification and regression trees, clustering, linear and integer optimization. Application areas include: healthcare, business, sports, manufacturing, finance, transportation, public sector.                                                                                                                                                                                                                                                                                                                                                                                                                                                                                                                                                                                                                                                                                       |                             |
| <b>Prerequisite</b> | MIE262, MIE263, MIE237 (or permission of the instructor)                                                                                                                                                                                                                                                                                                                                                                                                                                                                                                                                                                                                                                                                                                                                                                                                                                                                                                                                                                                                                                                                                                   |                             |
| <b>Policies</b>     | <p><u>Academic integrity</u>: Students are reminded of the seriousness of academic dishonesty in any form, including plagiarism. Students are expected to adhere to the “Code of Behaviour on Academic Matters” as well as the “Code of Student Conduct” available at <a href="http://www.governingcouncil.utoronto.ca/policies/behaveac.htm">http://www.governingcouncil.utoronto.ca/policies/behaveac.htm</a> and at <a href="http://www.governingcouncil.utoronto.ca/policies/studentc.htm">http://www.governingcouncil.utoronto.ca/policies/studentc.htm</a>, respectively. General academic integrity information is available at <a href="http://www.utoronto.ca/academicintegrity/">http://www.utoronto.ca/academicintegrity/</a>.</p> <p><u>Communication</u>: I access my email during regular business hours. Email should not be seen as an alternative to office hours, nor should it be used as a mechanism to receive private tutorials prior to an exam/assignment or on lecture material. Class-wide announcements will generally be made via the class website. Please post all questions regarding homework on the discussion board.</p> |                             |
| <b>Safety</b>       | As professional engineers in training, you have a responsibility to ensure that safety is duly considered at all times. You are expected to behave with your personal safety and the safety of others in mind. In order to be allowed access to any undergraduate labs, including computer labs, it is mandatory that you                                                                                                                                                                                                                                                                                                                                                                                                                                                                                                                                                                                                                                                                                                                                                                                                                                  |                             |

University of Toronto  
Department of Mechanical and Industrial Engineering  
**MIE368: Analytics in Action**  
(Fall 2020)

---

complete the MIE online health and safety training course. Instructions for the completion of safety training requirements have been sent in an e-mail to all students (also available here: <https://safetytraining.engineering.utoronto.ca/>).

|                |             |                |
|----------------|-------------|----------------|
| <b>Grading</b> | Project     | 66.6666666667% |
|                | Lab quizzes | 33.3333333333% |

The **Project** (4 students) will involve applying concepts and methods learned in the course to a problem identified by the student team. Students are responsible for clearly defining the problem, obtaining the data, developing the model(s), analyzing the results, and presenting the findings. The teaching team (instructor and TAs) will provide guidance and support throughout. Overall project grade will be based on:

- 1) One-page project proposal outlining the problem, data sources, and methods to be used
- 2) Three-page report summarizing data, initial findings, and changes to proposal
- 3) Half-page abstract
- 4) Five-minute final presentation
- 5) Eight-page final report

**Project deliverables (dates tentative)**

|                           |             |
|---------------------------|-------------|
| Proposal (10%):           | October 9   |
| Preliminary report (15%): | November 6  |
| Abstract (5%):            | November 27 |
| Presentation (25%):       | December 1  |
| Final report (45%):       | December 9  |

The teaching team will select teams to present their project during one of the final lectures. Based on the abstracts, which will be posted online, students will also be able to vote for the projects they wish to see presented. The teams that present will not receive any extra credit, only the admiration of their classmates.

**Lab quizzes** focus on developing proficiency in Python with the various methods presented in the course. The method will be introduced, students will have a chance to practice on their own, and then they will be evaluated on a problem in a quiz-like environment. Some lab sessions will be used for students to work on their projects with help from the TAs.

**Learning objectives:** By the end of this course, you should be able to:

- Recognize problems that are amenable to analytics methods and identify whether a predictive or prescriptive analytics approach is appropriate
- Apply an appropriate analytics approach to solve a problem using computer software
- Effectively communicate analytics content through written and oral formats

University of Toronto  
Department of Mechanical and Industrial Engineering  
**MIE368: Analytics in Action**  
(Fall 2020)

**Tentative Course Outline**

| Wk | Date         | Lecture (Monday)                                                        | Lab (Wednesday)                               | Tutorial (Thursday)     | Proj. deliverable |
|----|--------------|-------------------------------------------------------------------------|-----------------------------------------------|-------------------------|-------------------|
| 1  | Sep 7–11     | <i>No lecture</i>                                                       | <i>No lab</i>                                 | Course/project overview |                   |
| 2  | Sep 14–18    | Wine quality, Moneyball                                                 | Python and Colab intro, data engineering, EDA | Quiz 0 (not marked)     |                   |
| 3  | Sep 21–25    | Framingham heart study                                                  | Linear, logistic regression                   | Quiz 1                  |                   |
| 4  | Sep 28–Oct 2 | Supreme Court                                                           | CART, RF                                      | Quiz 2                  |                   |
| 5  | Oct 5–9      | Radiation therapy optimization                                          | Optimization                                  | Quiz 3                  | Proposal (F)      |
| 6  | Oct 12–16    | <i>Thanksgiving – no lecture</i>                                        | Project                                       | Project                 |                   |
| 7  | Oct 19–23    | eHarmony; Refugee resettlement                                          | Predict then optimize                         | Quiz 4                  |                   |
| 8  | Oct 26–30    | Hockey analytics; Netflix                                               | Clustering and model engineering              | Quiz 5                  |                   |
| 9  | Nov 2–6      | Sim. blackjack and tennis                                               | Simulation                                    | Quiz 6                  | Prelim report (F) |
| 10 | Nov 9–13     | <i>Fall study break</i>                                                 |                                               |                         |                   |
| 11 | Nov 16–20    | Identifying crime patterns; Travel time prediction in Dhaka, Bangladesh | Project                                       | Project                 |                   |
| 12 | Nov 23–27    | Women's College Hospital; NHL expansion draft                           | Project                                       | Project                 | Abstract (F)      |
| 13 | Nov 30–Dec 4 | AED location optimization                                               | Presentations                                 | Project                 | Presentation (T)  |
| 14 | Dec 7–11     | Student presentations, wrap-up                                          | <i>No lab</i>                                 | <i>No tutorial</i>      | Final report (W)  |
