# Supplementary material for: Introducing and Integrating Machine Learning in an Operations Research Curriculum: An Application-Driven Course
Source: Atypon-hosted journal article supplement (doi:10.1287/ited.2021.0256), 2023-01-01
Supplement: ited.2021.0256.sm2.zip [file Syllabus2019.pdf › UW_TeachingMaterial/Syllabus2019.pdf]

University of Wisconsin – Madison  
Department of Industrial and Systems Engineering  
**ISyE 601: Machine Learning in Action**  
Fall 2019

---

|                     |                                                                                                                                                                                                                                                                                                                                                                                                                                                                                     |         |
|---------------------|-------------------------------------------------------------------------------------------------------------------------------------------------------------------------------------------------------------------------------------------------------------------------------------------------------------------------------------------------------------------------------------------------------------------------------------------------------------------------------------|---------|
| <b>Instructors</b>  | Professor Justin J. Boutilier, ME 3246, <a href="mailto:jboutilier@wisc.edu">jboutilier@wisc.edu</a><br>Office hours: Thursday 1-3pm or by appointment                                                                                                                                                                                                                                                                                                                              |         |
| <b>Lectures</b>     | Tuesday 4-515pm                                                                                                                                                                                                                                                                                                                                                                                                                                                                     | ME 3121 |
|                     | Thursday 4-515pm                                                                                                                                                                                                                                                                                                                                                                                                                                                                    | ME 3121 |
| <b>Course Site</b>  | <a href="https://canvas.wisc.edu/courses/171130">https://canvas.wisc.edu/courses/171130</a>                                                                                                                                                                                                                                                                                                                                                                                         |         |
| <b>Description</b>  | This course introduces principles, algorithms, and applications of machine learning. We cover predictive analytics, with a focus on combining data and models to improve decision-making. Methods include: statistics, linear regression, logistic regression, regularization, over-fitting, clustering, classification and regression trees, boosting, bagging, deep learning, and neural networks. Applications areas include: healthcare, transportation, and the public sector. |         |
| <b>References</b>   | <i>The Analytics Edge</i> by Bertimas, O’Hair, and Pulleyblank, Dynamic Ideas.<br><i>Pattern Recognition and Machine Learning</i> by Bishop, Springer.                                                                                                                                                                                                                                                                                                                              |         |
| <b>Prerequisite</b> | ISyE 301, ISyE 312, ISyE 323 or permission of the instructor                                                                                                                                                                                                                                                                                                                                                                                                                        |         |
| <b>Credits</b>      | This is a 3-credit course that meets for two, 75-minute class periods each week and carries the expectation that students will work on course learning activities (reading, labs, homework, etc.) for about 3 hours out of the classroom for every class period.                                                                                                                                                                                                                    |         |
| <b>Policies</b>     | Students are reminded of the importance of academic integrity and seriousness of academic dishonesty in any form, including plagiarism. Please see <a href="https://conduct.students.wisc.edu/misconduct/academic-integrity/">https://conduct.students.wisc.edu/misconduct/academic-integrity/</a> for more information.                                                                                                                                                            |         |
| <b>Grading</b>      | Homework                                                                                                                                                                                                                                                                                                                                                                                                                                                                            | 40%     |
|                     | Quizzes                                                                                                                                                                                                                                                                                                                                                                                                                                                                             | 20%     |
|                     | Final exam                                                                                                                                                                                                                                                                                                                                                                                                                                                                          | 40%     |
| <b>Labs</b>         | Labs, in the form of Jupyter Notebooks, will focus on developing proficiency in the analytical methods presented. Labs will use Python to implement methods using real-world data.                                                                                                                                                                                                                                                                                                  |         |

University of Wisconsin – Madison  
Department of Industrial and Systems Engineering  
**ISyE 601: Machine Learning in Action**  
Fall 2019

---

- Homework** Students are encouraged to work in groups of 2 (but no more!). Homework is to be submitted online through the course website. Scans of hand-written work are accepted, but must legible; if we can't read it, we can't grade it. This course follows a strict lateness policy: *late homework will not be accepted*. The homework schedule is as follows:
- *Homework 0*: Assigned on Sept 24, due on Oct 10 before 4pm
  - *Homework 1*: Assigned on Oct 15, due on Oct 31 before 4pm
  - *Homework 2*: Assigned on Nov 5, due on Nov 21 before 4pm
  - *Homework 3*: Assigned on Nov 26, due on Dec 11 before 4pm
- Quizzes** Short (15-20min) quizzes will be administered in class throughout the semester. The quiz schedule is as follows:
- *Quiz 0 – Sept 26*: Concepts and EDA
  - *Quiz 1 – Oct 8*: Linear and logistic regression
  - *Quiz 2 – Oct 17*: Clustering and KNN
  - *Quiz 3 – Nov 5*: Cart and random forest
  - *Quiz 4 – Nov 19*: Ensembles and SVMs
- Final Exam** The final exam will be cumulative and will take place in class on December 18, 2019 from 725-925pm.
- Learning Objectives** By the end of this course, you will be able to:
- Identify problems amenable to machine learning and the techniques required to solve those problems (regression vs. classification, regularization, bagging vs. boosting, etc.)
  - Apply appropriate analytical models to solve problems and improve decision-making using Python
  - Effectively communicate findings through both oral and written formats

University of Wisconsin – Madison  
Department of Industrial and Systems Engineering  
**ISyE 601: Machine Learning in Action**  
Fall 2019

| Week | Dates           | Tuesday                             | Thursday                            | Lab                      |
|------|-----------------|-------------------------------------|-------------------------------------|--------------------------|
| 1    | Sept 2-6        | NO CLASS                            | The language of machine learning    | Python refresher         |
| 2    | Sept 9-13       | Linear regression                   | Trade-offs and model training       | EDA, feature engineering |
| 3    | Sept 16-20      | Trade-offs and model training       | Exploratory data analysis           |                          |
| 4    | Sept 23-27      | Feature engineering                 | The Framingham heart study          | Logistic regression      |
| 5    | Sept 30 – Oct 4 | Logistic regression                 | Logistic regression                 |                          |
| 6    | Oct 7-11        | Clustering                          | Clustering / K-nearest neighbors    | Clustering, KNN          |
| 7    | Oct 14-18       | K-nearest neighbors                 | Supreme court predictions           |                          |
| 8    | Oct 21-25       | Guest speaker                       | Classification and regression trees | CART, random forest      |
| 9    | Oct 28 – Nov 1  | Classification and regression trees | Random forest                       |                          |
| 10   | Nov 4-8         | Ensemble methods                    | Ensemble methods                    | Ensembles, SVM           |
| 11   | Nov 11-15       | Support vector machines             | Support vector machines             |                          |
| 12   | Nov 18-22       | The history of deep learning        | Neural networks                     | Neural networks          |
| 13   | Nov 25-29       | Neural networks                     | NO CLASS                            |                          |
| 14   | Dec 2-6         | Communicating analytics – written   | Communicating analytics – oral      |                          |
| 15   | Dec 9-13        | Exam review                         | NO CLASS                            |                          |
